# Supplementary material
Source: PubMed Central journal article supplement (PMC6179430)
Supplement: 2347_Popp_Supplementary_Data.pdf [file 2347_Popp_Supplementary_Data.pdf]

## Supplementary Material

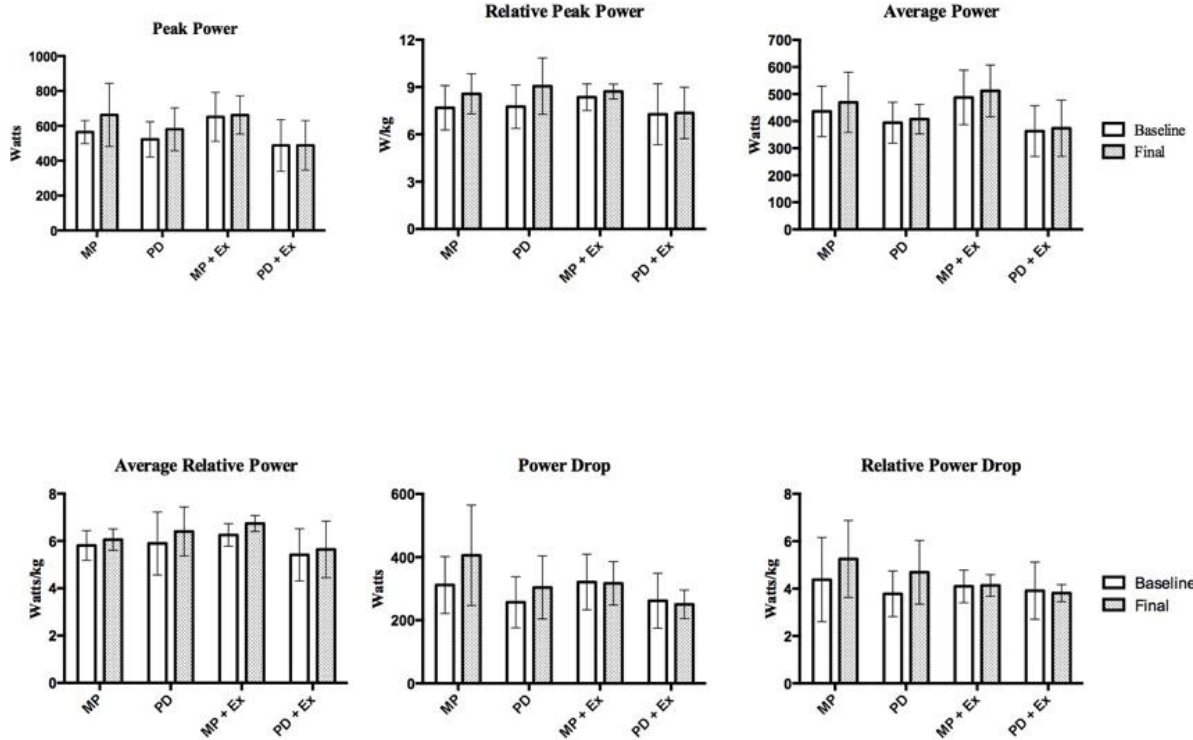

**Anaerobic Power.** There was a non-significant interaction between TP\*D\*Ex for all anaerobic power variables, peak power ( $p = 0.732$ ), relative peak power ( $p = 0.498$ ), power drop ( $p = 0.708$ ), relative power drop ( $p = 0.855$ ). TP, time point; D, diet; Ex, exercise; MP, MyPlate diet; PD, Paleolithic-based diet; MP + Ex, MyPlate diet + exercise; PD + Ex, Paleolithic-based diet + exercise. Data represent mean  $\pm$  SEM;  $p < 0.05$ .

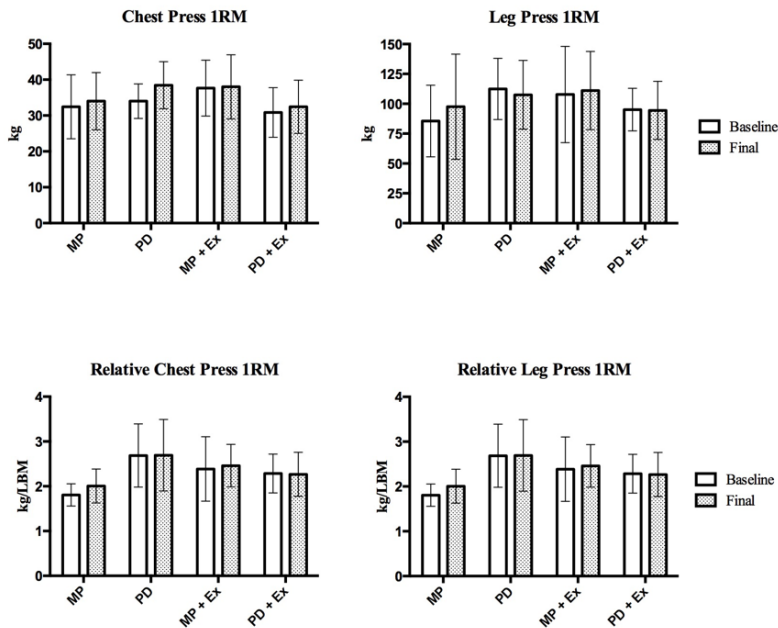

**Upper and lower body strength<sup>1</sup>.** There was no significant interaction between TP\*D\*Ex for leg press ( $p = 0.427$ ), and chest press ( $p = 0.753$ ). LBM, lean body mass; TP, time point; D, diet; Ex, exercise; MP, MyPlate diet; PD, Paleolithic-based diet; MP + Ex, MyPlate diet + exercise; PD + Ex, Paleolithic-based diet + exercise. Data represent mean  $\pm$  SEM;  $p < 0.05$ . <sup>1</sup> Relative measures of chest press and leg press were determined by dividing body mass by LBM. LBM was determined using dual energy x-ray absorptiometry at baseline. LBM: Lean body mass

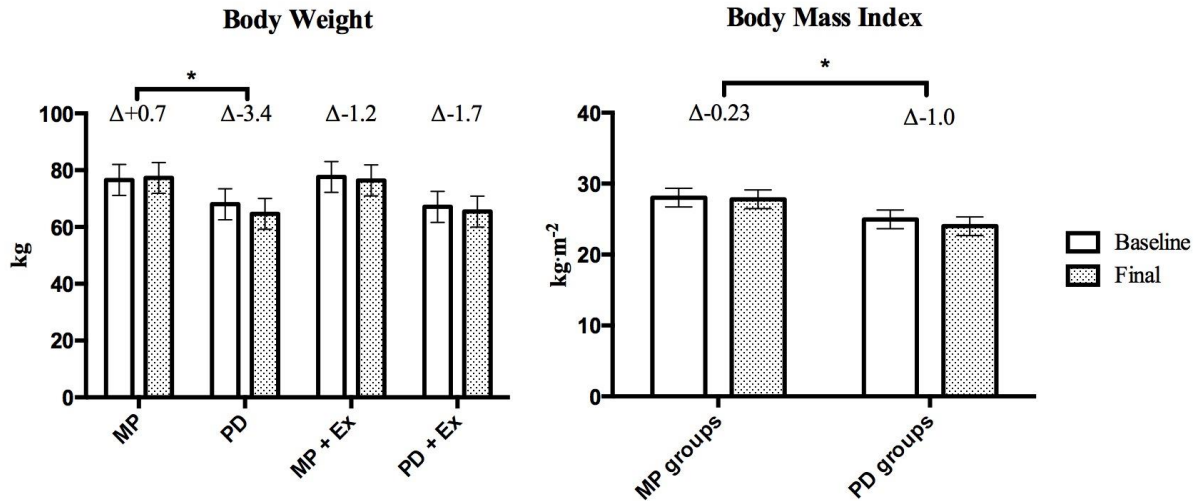

**Body weight and body mass index.** There was a statistically significant three-way interaction between TP\*D\*Ex for only BW ( $p = 0.047$ ). The contrast suggests the  $\Delta$ BW for participants in the PD group was significantly different than the  $\Delta$ BW for those in the MP group ( $p = 0.0029$ ). BMI followed a similar trend; the  $\Delta$ BMI was significantly different for the PD group than the  $\Delta$ BMI for the PD ( $p = 0.042$ ). BW, body weight; BMI, body mass index; TP, time point; D, diet; Ex, exercise; MP, MyPlate diet; PD, Paleolithic-based diet; MP + Ex, MyPlate diet + exercise; PD + Ex, Paleolithic-based diet + exercise. Data represent mean  $\pm$  SEM;  $p < 0.05$ .

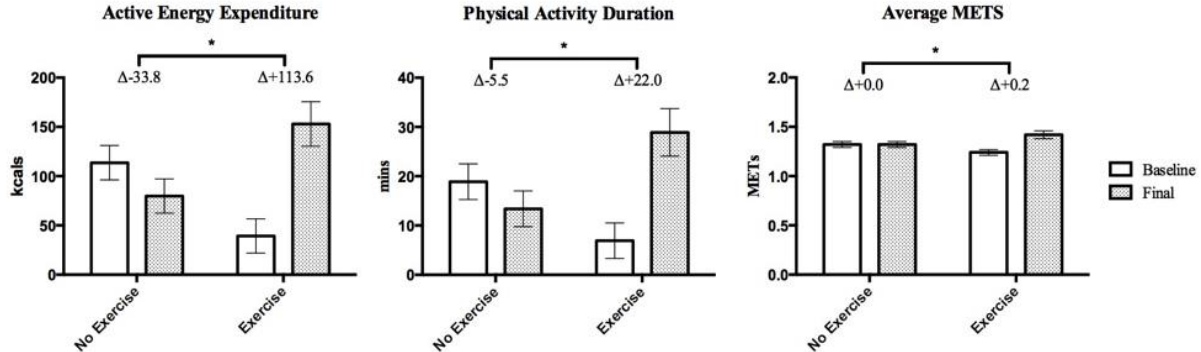

**Active energy expenditure, physical activity duration and METs.** There was a non-significant difference in TEE ( $p = 0.385$ ), PAL ( $p = 0.561$ ), sedentary time ( $p = 0.671$ ) and steps ( $P = 0.573$ ) for all four groups (not shown). There was a two-way interaction for TP\*Ex for AEE ( $p = 0.001$ ), physical activity duration ( $p = 0.004$ ) and METs ( $p = 0.013$ ). AEE, PAD and METs also had two-way interactions for TP\*D. TEE, total energy expenditure; PAL, physical activity level; AEE, active energy expenditure; METs, metabolic equivalents of task; TP, time point; D, diet; Ex, exercise; MP, MyPlate diet; PD, Paleolithic-based diet; MP + Ex, MyPlate diet + exercise; PD + Ex, Paleolithic-based diet + exercise. Data represent mean  $\pm$  SEM;  $p < 0.05$ .
